# Supplementary material for: Time-Dependent Changes in Protein Composition of Medial Prefrontal Cortex in Rats with Neuropathic Pain
Source: MDPI journal article supplement (doi:10.3390/ijms23020955), 2022-01-16
Supplement: s1 [file s1]

**Table S2. LC-MS/MS analysis of altered protein spots in PNS fractions isolated from the mPFC of SNL-treated versus sham-treated rats 8 weeks after the surgery; list of exclusive unique peptides used for identification.**

| Spot | Accession number | Protein name                             | Exclusive unique peptides          | Modifications                                | SC <sup>a</sup> [%] | MW <sup>b</sup> (kDa) | pI <sup>c</sup> |
|------|------------------|------------------------------------------|------------------------------------|----------------------------------------------|---------------------|-----------------------|-----------------|
| 1    | NP_001004279.1   | peptidyl-prolyl cis-trans isomerase      | (R)VFFDVDIGGER(V)                  |                                              | 49                  | 40.7                  | 7.27            |
|      |                  |                                          | (R)IVLELFADIVPK(T)                 |                                              |                     |                       |                 |
|      |                  |                                          | (K)HVVFGQVIK(G)                    |                                              |                     |                       |                 |
|      |                  |                                          | (R)mLENVEVNGEKPAK(L)               | Oxidation (+16)                              |                     |                       |                 |
|      |                  |                                          | (R)MLENVEVNGEKPAK(L)               |                                              |                     |                       |                 |
|      |                  |                                          | (K)LcVIAEcGELK(E)                  | Carbamidomethyl (+57), Carbamidomethyl (+57) |                     |                       |                 |
|      |                  |                                          | (K)LcVIAEcGELKEGDEWGIFPK(D)        | Carbamidomethyl (+57), Carbamidomethyl (+57) |                     |                       |                 |
|      |                  |                                          | (K)DGSGDSHPDFPEDADIDLK(D)          |                                              |                     |                       |                 |
|      |                  |                                          | (K)DGSGDSHPDFPEDADIDLKDVK(I)       |                                              |                     |                       |                 |
|      |                  |                                          | (K)ILLISED(LK)(N)                  |                                              |                     |                       |                 |
|      |                  |                                          | (K)NIGNTFFK(S)                     |                                              |                     |                       |                 |
|      |                  |                                          | (R)LQPIALScVLNIGAcK(L)             | Carbamidomethyl (+57), Carbamidomethyl (+57) |                     |                       |                 |
|      |                  |                                          | (K)MSNWQGAIDScLEALEMDPSNTK(A)      | Carbamidomethyl (+57)                        |                     |                       |                 |
|      |                  |                                          | (K)mSNWQGAIDScLEALEMDPSNTK(A)      | Oxidation (+16), Carbamidomethyl (+57)       |                     |                       |                 |
|      |                  |                                          | (K)AQQWQGLK(E)                     |                                              |                     |                       |                 |
|      |                  |                                          | (K)EYDQALADLK(K)                   |                                              |                     |                       |                 |
|      |                  |                                          | (K)EYDQALADLKK(A)                  |                                              |                     |                       |                 |
| 2    | NP_058704.1      | glyceraldehyde-3-phosphate dehydrogenase | (K)VDIVAINDPFIDLNYmVYmFQYDSTHGK(F) | Oxidation (+16)                              | 70                  | 35.8                  | 8.87            |
|      |                  |                                          | (K)VDIVAINDPFIDLNYmVYmFQYDSTHGK(F) | Oxidation (+16), Oxidation (+16)             |                     |                       |                 |
|      |                  |                                          | (K)LVINGKPITIFQER(D)               |                                              |                     |                       |                 |
|      |                  |                                          | (K)LVINGKPITIFQERDPANIK(W)         |                                              |                     |                       |                 |
|      |                  |                                          | (R)DPANIKWGDAGAEYVVESTGVFTTmEK(A)  | Oxidation (+16)                              |                     |                       |                 |
|      |                  |                                          | (K)WGDAGAEYVVESTGVFTTMEK(A)        |                                              |                     |                       |                 |
|      |                  |                                          | (K)WGDAGAEYVVESTGVFTTmEK(A)        | Oxidation (+16)                              |                     |                       |                 |
|      |                  |                                          | (K)RVIISAPSADAPmFVmGVNHEK(Y)       | Oxidation (+16), Oxidation (+16)             |                     |                       |                 |
|      |                  |                                          | (K)IVSNAScTTNcLAPLAK(V)            | Carbamidomethyl (+57), Carbamidomethyl (+57) |                     |                       |                 |
|      |                  |                                          | (K)VIHDNFGIVEGLmTTVHAITATQK(T)     | Oxidation (+16)                              |                     |                       |                 |
|      |                  |                                          | (R)GAAQNIIPASTGAAK(A)              |                                              |                     |                       |                 |
|      |                  |                                          | (R)VPTPNVSVVDLTcR(L)               | Carbamidomethyl (+57)                        |                     |                       |                 |

|   |                |                                                  |                                                   |                                              |    |      |      |
|---|----------------|--------------------------------------------------|---------------------------------------------------|----------------------------------------------|----|------|------|
|   |                |                                                  | (K)GILGYTEDQVVScDFNSNSHSSTFDAGAGIALNDNFVK(L)      | Carbamidomethyl (+57)                        |    |      |      |
|   |                |                                                  | (K)LISWYDNEYGYSNR(V)                              |                                              |    |      |      |
|   |                |                                                  | (R)VVDLmAYMASK(-)                                 | Oxidation (+16)                              |    |      |      |
|   |                |                                                  | (R)VVDLmAYmASKE(-)                                | Oxidation (+16), Oxidation (+16)             |    |      |      |
| 3 | NP_075211.2    | triosephosphate isomerase                        | (K)cLGELIcTLNAAK(L)                               | Carbamidomethyl (+57), Carbamidomethyl (+57) | 68 | 26.9 | 7.20 |
|   |                |                                                  | (K)LPADTEVVcAPPTAYIDFAR(Q)                        | Carbamidomethyl (+57)                        |    |      |      |
|   |                |                                                  | (K)IAVAAQNcYK(V)                                  | Carbamidomethyl (+57)                        |    |      |      |
|   |                |                                                  | (K)VTNGAFTGEISPGMIK(D)                            |                                              |    |      |      |
|   |                |                                                  | (K)VTNGAFTGEISPGmIK(D)                            | Oxidation (+16)                              |    |      |      |
|   |                |                                                  | (K)DLGATWVVLGHSE(R)                               |                                              |    |      |      |
|   |                |                                                  | (R)RHIFGESDELIGQK(V)                              |                                              |    |      |      |
|   |                |                                                  | (R)HIFGESDELIGQK(V)                               |                                              |    |      |      |
|   |                |                                                  | (K)VNHALSEGLGVIAcIGEK(L)                          | Carbamidomethyl (+57)                        |    |      |      |
|   |                |                                                  | (K)VVLAYEPVWAIGTGK(T)                             |                                              |    |      |      |
|   |                |                                                  | (K)TATPQQAQEVHEK(L)                               |                                              |    |      |      |
|   |                |                                                  | (K)cNVSEGVAQcTR(I)                                | Carbamidomethyl (+57), Carbamidomethyl (+57) |    |      |      |
|   |                |                                                  | (R)IIYGGSVTGATcK(E)                               | Carbamidomethyl (+57)                        |    |      |      |
|   |                |                                                  | (K)ELASQPDVDGFLVGGASLKPEFVDIINAK(-)               |                                              |    |      |      |
| 4 | XP_006252159.1 | dihydropyrimidinase-related protein 2 isoform X1 | (R)mVIPGGIDVHTR(F)                                | Oxidation (+16)                              | 52 | 73.1 | 5.87 |
|   |                |                                                  | (R)FQmPDQGmTSADDFQGTK(A)                          | Oxidation (+16), Oxidation (+16)             |    |      |      |
|   |                |                                                  | (K)GIQEEMEALVK(D)                                 |                                              |    |      |      |
|   |                |                                                  | (K)DRFQLTDSQIYEVLSVIR(D)                          |                                              |    |      |      |
|   |                |                                                  | (R)FQLTDSQIYEVLSVIR(D)                            |                                              |    |      |      |
|   |                |                                                  | (R)DIGAIAQVHAENGDIIEEQQR(I)                       |                                              |    |      |      |
|   |                |                                                  | (R)ILDLGITGPEGHVLSRPEEVEAEAVNR(S)                 |                                              |    |      |      |
|   |                |                                                  | (R)SITIANQTNcPLYVTK(V)                            | Carbamidomethyl (+57)                        |    |      |      |
|   |                |                                                  | (K)SAAEVIAQAR(K)                                  |                                              |    |      |      |
|   |                |                                                  | (K)GTVVYGEPITASLGTGSHYWSK(N)                      |                                              |    |      |      |
|   |                |                                                  | (K)AAAFVTSPLSPDPTTPDFLNSLLScGDLQVTGSAHcTFNTAQK(A) | Carbamidomethyl (+57), Carbamidomethyl (+57) |    |      |      |
|   |                |                                                  | (K)DNFTLIPEGTNGTEER(M)                            |                                              |    |      |      |
|   |                |                                                  | (R)ISVGSDADLVIWDPDSVK(T)                          |                                              |    |      |      |
|   |                |                                                  | (K)THNSALEYNIFEGmEcR(G)                           | Oxidation (+16), Carbamidomethyl (+57)       |    |      |      |
|   |                |                                                  | (R)GSPLVVISQGK(I)                                 |                                              |    |      |      |

|  |  |  |                        |  |  |  |  |
|--|--|--|------------------------|--|--|--|--|
|  |  |  | (K)IVLEDGTLHVTEGSGR(Y) |  |  |  |  |
|  |  |  | (R)KPFPDFVYK(R)        |  |  |  |  |

<sup>a</sup> the percentage of the sequence covered by identifications from the included searches

<sup>b</sup> the molecular weight of the protein

<sup>c</sup> the observed isoelectric point value
