# Supplementary material for: Time-Dependent Changes in Protein Composition of Medial Prefrontal Cortex in Rats with Neuropathic Pain
Source: MDPI journal article supplement (doi:10.3390/ijms23020955), 2022-01-16
Supplement: s1 [file s1]

**Table S1. LC-MS/MS analysis of altered protein spots in PNS fractions isolated from mPFC of SNL-treated versus sham-treated rats 2 weeks after the surgery; list of exclusive unique peptides used for protein identification.**

| Spot | Accession number | Protein name                                          | Exclusive unique peptides                   | Modifications         | SC <sup>a</sup> [%] | MW <sup>b</sup> (kDa) | pI <sup>c</sup> |
|------|------------------|-------------------------------------------------------|---------------------------------------------|-----------------------|---------------------|-----------------------|-----------------|
| 1    | NP_077327.1      | Heat shock cognate 71 kDa protein                     | (K)GPAVGIDLGTTYScVGVFQHGK(V)                | Carbamidomethyl (+57) | 69                  | 71                    | 5.47            |
|      |                  |                                                       | (K)NQVAmNPTNTVFDK(R)                        | Oxidation (+16)       |                     |                       |                 |
|      |                  |                                                       | (R)RFDDAVVQSDMK(H)                          |                       |                     |                       |                 |
|      |                  |                                                       | (R)FDDAVVQSDmK(H)                           | Oxidation (+16)       |                     |                       |                 |
|      |                  |                                                       | (K)HWPFMVVNDAGRPK(V)                        |                       |                     |                       |                 |
|      |                  |                                                       | (K)VQVEYKGETK(S)                            |                       |                     |                       |                 |
|      |                  |                                                       | (K)SFYPEEVSSMVLTK(M)                        |                       |                     |                       |                 |
|      |                  |                                                       | (K)mKEIAEAYLGK(T)                           | Oxidation (+16)       |                     |                       |                 |
|      |                  |                                                       | (K)EIAEAYLGK(T)                             |                       |                     |                       |                 |
|      |                  |                                                       | (K)TVTNAVVTVPAYFNDSQR(Q)                    |                       |                     |                       |                 |
|      |                  |                                                       | (K)DAGTIAGLNVL(R)                           |                       |                     |                       |                 |
|      |                  |                                                       | (R)MVNHFAIEFK(R)                            |                       |                     |                       |                 |
|      |                  |                                                       | (R)TLSSSTQASIEIDSLYEGIDFYTSITR(A)           |                       |                     |                       |                 |
|      |                  |                                                       | (K)SQIHDIIVLVGGSTR(I)                       |                       |                     |                       |                 |
|      |                  |                                                       | (K)SINPDEAVAYGAAVQAAILSGDK(S)               |                       |                     |                       |                 |
|      |                  |                                                       | (K)FELTGIPPAPR(G)                           |                       |                     |                       |                 |
|      |                  |                                                       | (K)NSLESYAFNMK(A)                           |                       |                     |                       |                 |
|      |                  |                                                       | (K)cNEIISWLDK(N)                            | Carbamidomethyl (+57) |                     |                       |                 |
|      |                  |                                                       | (K)cNEIISWLDKNQTAEKEEFHQK(E)                | Carbamidomethyl (+57) |                     |                       |                 |
|      |                  |                                                       | (K)LYQSAGGMPGGMPGGFPGGGAPPSGGASSGPTIEEVD(-) |                       |                     |                       |                 |
|      |                  |                                                       | (R)mVNHFAIEFK(R)                            | Oxidation (+16)       |                     |                       |                 |
|      |                  |                                                       | (K)SFYPEEVSSmVLTK(M)                        | Oxidation (+16)       |                     |                       |                 |
|      |                  |                                                       | (K)SQIHDIIVLVGGSTR(I)                       |                       |                     |                       |                 |
| 2    | NP_059023.1      | Guanine nucleotide-binding protein G(O) subunit alpha | (K)NLKEDGISAAK(D)                           |                       | 58                  | 40                    | 5.48            |
|      |                  |                                                       | (K)IIHEDGFSGEDVK(Q)                         |                       |                     |                       |                 |
|      |                  |                                                       | (R)AMDTLGVEYGDK(E)                          |                       |                     |                       |                 |
|      |                  |                                                       | (R)AMDTLGVEYGDKER(K)                        |                       |                     |                       |                 |
|      |                  |                                                       | (R)AmDTLGVEYGDKER(K)                        | Oxidation (+16)       |                     |                       |                 |
|      |                  |                                                       | (R)MEDTEPFSAELLSAMMR(L)                     |                       |                     |                       |                 |
|      |                  |                                                       | (R)MEDTEPFSAELLSAmMR(L)                     | Oxidation (+16)       |                     |                       |                 |

|   |             |                            |                                       |                                                 |    |      |      |
|---|-------------|----------------------------|---------------------------------------|-------------------------------------------------|----|------|------|
|   |             |                            | (R)MEDTEPFSAELLSAMmR(L)               | Oxidation (+16)                                 |    |      |      |
|   |             |                            | (R)LWGDSGIQEcFNR(S)                   | Carbamidomethyl (+57)                           |    |      |      |
|   |             |                            | (R)SREYQLNDSAK(Y)                     |                                                 |    |      |      |
|   |             |                            | (R)EYQLNDSAK(Y)                       |                                                 |    |      |      |
|   |             |                            | (R)IGAADYQPTEQDILR(T)                 |                                                 |    |      |      |
|   |             |                            | (R)MHESLMLFDSIcNNK(F)                 | Carbamidomethyl (+57)                           |    |      |      |
|   |             |                            | (K)FFIDTSIILFLNK(K)                   |                                                 |    |      |      |
|   |             |                            | (K)KSPLTIcFPEYPGSNTYEDAAAYIQTQFESK(N) | Carbamidomethyl (+57)                           |    |      |      |
|   |             |                            | (K)SPLTIcFPEYPGSNTYEDAAAYIQTQFESK(N)  | Carbamidomethyl (+57)                           |    |      |      |
| 3 | P62260.1    | 14-3-3 protein epsilon     | (-)mDDREDLVYQAK(L)                    | Acetyl (+42)                                    | 84 | 29   | 4.86 |
|   |             |                            | (K)LAEQAERYDEMVESMK(K)                |                                                 |    |      |      |
|   |             |                            | (R)YDEMVESMK(K)                       |                                                 |    |      |      |
|   |             |                            | (R)YDEMVESmK(K)                       | Oxidation (+16)                                 |    |      |      |
|   |             |                            | (K)KVAGMDVELTVEER(N)                  |                                                 |    |      |      |
|   |             |                            | (K)VAGMDVELTVEER(N)                   |                                                 |    |      |      |
|   |             |                            | (K)VAGmDVELTVEER(N)                   | Oxidation (+16)                                 |    |      |      |
|   |             |                            | (K)LiccDILDVLDK(H)                    | Carbamidomethyl (+57),<br>Carbamidomethyl (+57) |    |      |      |
|   |             |                            | (K)LiccDILDVLDKHLIPAANTGESK(V)        | Carbamidomethyl (+57),<br>Carbamidomethyl (+57) |    |      |      |
|   |             |                            | (K)HLIPAANTGESK(V)                    |                                                 |    |      |      |
|   |             |                            | (R)YLAEFATGNDR(K)                     |                                                 |    |      |      |
|   |             |                            | (R)YLAEFATGNDRK(E)                    |                                                 |    |      |      |
|   |             |                            | (K)EAAENSLVAYK(A)                     |                                                 |    |      |      |
|   |             |                            | (K)AASDIAMTELPPTHPIR(L)               |                                                 |    |      |      |
|   |             |                            | (K)AAFDDAIAELDTLSEESYK(D)             |                                                 |    |      |      |
|   |             |                            | (R)DNLTWLTSMDMQGDGEEQNK(E)            |                                                 |    |      |      |
|   |             |                            | (R)DNLTWLTSMDMQGDGEEQNKEALQDVEDENQ(-) |                                                 |    |      |      |
|   |             |                            | (K)EALQDVEDENQ(-)                     |                                                 |    |      |      |
| 4 | NP_037150.2 | Ras-related protein Rab-3A | (K)ESSDQNFDFYMFK(I)                   |                                                 | 49 | 25   | 4.73 |
|   |             |                            | (R)YADDSFTPAFVSTVGIDFK(V)             |                                                 |    |      |      |
|   |             |                            | (K)TYSWDNAQVLLVGNK(C)                 |                                                 |    |      |      |
|   |             |                            | (R)QLADHLGFEFFASAK(D)                 |                                                 |    |      |      |
|   |             |                            | (K)MSESLDTADPAVTGAK(Q)                |                                                 |    |      |      |
|   |             |                            | (K)mSESLDTADPAVTGAK(Q)                | Oxidation (+16)                                 |    |      |      |
| 5 | NP_997477.1 | lactoylglutathione lyase   | (K)DFLLQQTmLR(I)                      | Oxidation (+16)                                 | 56 | 20.8 | 5.13 |

|   |             |                                            |                                           |                                                 |    |      |      |
|---|-------------|--------------------------------------------|-------------------------------------------|-------------------------------------------------|----|------|------|
|   |             |                                            | (K)DFLLQQTMLR(I)                          |                                                 |    |      |      |
|   |             |                                            | (R)VLGLTLLQK(L)                           |                                                 |    |      |      |
|   |             |                                            | (K)FSLYFLAYEDK(N)                         |                                                 |    |      |      |
|   |             |                                            | (K)FSLYFLAYEDKNDIPK(D)                    |                                                 |    |      |      |
|   |             |                                            | (K)FSLYFLAYEDKNDIPKDK(T)                  |                                                 |    |      |      |
|   |             |                                            | (K)ATLELTHNWGTEDDETQSYHNGNSDPR(G)         |                                                 |    |      |      |
|   |             |                                            | (R)GFGHIGIAVPDVYEAcK(R)                   | Carbamidomethyl (+57)                           |    |      |      |
|   |             |                                            | (R)GFGHIGIAVPDVYEAcKR(F)                  | Carbamidomethyl (+57)                           |    |      |      |
|   |             |                                            | (K)GLAFVQDPDGYWIEILNPNK(M)                |                                                 |    |      |      |
| 6 | NP_058932.1 | phosphatidylethanolamine-binding protein 1 | (R)VDYGGVTVDELGK(V)                       |                                                 | 62 | 20.8 | 5.47 |
|   |             |                                            | (K)VLTPTQV <sub>m</sub> NRSSISWDGLDPGK(L) | Oxidation (+16)                                 |    |      |      |
|   |             |                                            | (K)LYTLVLTDPDAPSR(K)                      |                                                 |    |      |      |
|   |             |                                            | (K)LYTLVLTDPDAPSRK(D)                     |                                                 |    |      |      |
|   |             |                                            | (K)GNDISSGTVLSEYVGSGPPK(D)                |                                                 |    |      |      |
|   |             |                                            | (K)GNDISSGTVLSEYVGSGPPKDTGLHR(Y)          |                                                 |    |      |      |
|   |             |                                            | (R)YVWLVEYEQPLNcDEPILSNK(S)               | Carbamidomethyl (+57)                           |    |      |      |
|   |             |                                            | (K)YHLGAPVAGTcFQAEWDDSVPK(L)              | Carbamidomethyl (+57)                           |    |      |      |
| 7 | NP_075211.2 | triosephosphate isomerase                  | (K)cLGELIcTLNAAK(L)                       | Carbamidomethyl (+57),<br>Carbamidomethyl (+57) | 71 | 26.9 | 7.37 |
|   |             |                                            | (K)LPADTEVVcAPPTAYIDFAR(Q)                | Carbamidomethyl (+57)                           |    |      |      |
|   |             |                                            | (K)IAVAAQNcYK(V)                          | Carbamidomethyl (+57)                           |    |      |      |
|   |             |                                            | (K)VTNGAFTGEISPGMIK(D)                    |                                                 |    |      |      |
|   |             |                                            | (K)VTNGAFTGEISPGmIK(D)                    | Oxidation (+16)                                 |    |      |      |
|   |             |                                            | (K)DLGATWVVLGHSER(R)                      |                                                 |    |      |      |
|   |             |                                            | (R)RHIFGESDELIGQK(V)                      |                                                 |    |      |      |
|   |             |                                            | (R)HIFGESDELIGQK(V)                       |                                                 |    |      |      |
|   |             |                                            | (K)VNHALSEGLGVIAcIGEKL(L)                 | Carbamidomethyl (+57)                           |    |      |      |
|   |             |                                            | (K)VVLAYEPVWAIGTGK(T)                     |                                                 |    |      |      |
|   |             |                                            | (K)TATPQQAQEVHEK(L)                       |                                                 |    |      |      |
|   |             |                                            | (K)cNVSEGVAQcTR(I)                        | Carbamidomethyl (+57),<br>Carbamidomethyl (+57) |    |      |      |
|   |             |                                            | (R)IIYGGSVTGATcK(E)                       | Carbamidomethyl (+57)                           |    |      |      |
|   |             |                                            | (K)ELASQPDVDGFLVGGASLKPEFVDIINAK(-)       |                                                 |    |      |      |
| 8 | NP_075211.2 | triosephosphate isomerase                  | (K)cLGELIcTLNAAK(L)                       | Carbamidomethyl (+57),<br>Carbamidomethyl (+57) | 64 | 26.9 | 7.59 |
|   |             |                                            | (K)IAVAAQNcYK(V)                          | Carbamidomethyl (+57)                           |    |      |      |

|    |             |                                                                             |                                     |                                                 |    |      |      |
|----|-------------|-----------------------------------------------------------------------------|-------------------------------------|-------------------------------------------------|----|------|------|
|    |             |                                                                             | (K)VTNGAFTGEISPGMIK(D)              |                                                 |    |      |      |
|    |             |                                                                             | (K)VTNGAFTGEISPGmIK(D)              | Oxidation (+16)                                 |    |      |      |
|    |             |                                                                             | (K)DLGATWVVLGHSER(R)                |                                                 |    |      |      |
|    |             |                                                                             | (R)RHIFGESDELIGQK(V)                |                                                 |    |      |      |
|    |             |                                                                             | (R)HIFGESDELIGQK(V)                 |                                                 |    |      |      |
|    |             |                                                                             | (K)VNHALSEGLGVIAcIGEK(L)            | Carbamidomethyl (+57)                           |    |      |      |
|    |             |                                                                             | (K)VVLAYEPVWAIGTGK(T)               |                                                 |    |      |      |
|    |             |                                                                             | (K)TATPQQAQEVHEK(L)                 |                                                 |    |      |      |
|    |             |                                                                             | (K)cNVSEGVAQcTR(I)                  | Carbamidomethyl (+57),<br>Carbamidomethyl (+57) |    |      |      |
|    |             |                                                                             | (R)IIYGGSVTGATcK(E)                 | Carbamidomethyl (+57)                           |    |      |      |
|    |             |                                                                             | (K)ELASQPDVDGFLVGGASLKPEFVDIINAK(-) |                                                 |    |      |      |
| 9  | NP_446090.1 | isocitrate dehydrogenase<br>[NAD] subunit alpha,<br>mitochondrial precursor | (R)NVTAIQGPGGK(W)                   |                                                 | 46 | 39.6 | 6.13 |
|    |             |                                                                             | (K)TPIAAGHPSMNLLLR(K)               |                                                 |    |      |      |
|    |             |                                                                             | (K)TPIAAGHPSmNLLLR(K)               | Oxidation (+16)                                 |    |      |      |
|    |             |                                                                             | (K)TFDLYANVRPcVSIEGYK(T)            | Carbamidomethyl (+57)                           |    |      |      |
|    |             |                                                                             | (K)TPYTDVNIVTIR(E)                  |                                                 |    |      |      |
|    |             |                                                                             | (R)ENTEGEYSGIEHVIVDGVVQSIK(L)       |                                                 |    |      |      |
|    |             |                                                                             | (K)RIAEFAFEYAR(N)                   |                                                 |    |      |      |
|    |             |                                                                             | (R)IAEFAFEYAR(N)                    |                                                 |    |      |      |
|    |             |                                                                             | (R)mSDGLFLQK(C)                     | Oxidation (+16)                                 |    |      |      |
|    |             |                                                                             | (R)MSDGLFLQK(C)                     |                                                 |    |      |      |
|    |             |                                                                             | (K)DmANPTALLLSAVmMLR(H)             | Oxidation (+16), Oxidation<br>(+16)             |    |      |      |
|    |             |                                                                             | (K)DMANPTALLLSAVmMLR(H)             | Oxidation (+16)                                 |    |      |      |
|    |             |                                                                             | (R)HmGLFDHAAK(I)                    | Oxidation (+16)                                 |    |      |      |
|    |             |                                                                             | (K)IEAAcFATIK(D)                    | Carbamidomethyl (+57)                           |    |      |      |
|    |             |                                                                             | (K)cSDFTEEIcR(R)                    | Carbamidomethyl (+57),<br>Carbamidomethyl (+57) |    |      |      |
| 10 | NP_150238.1 | malate dehydrogenase,<br>cytoplasmic isoform MDH1                           | (K)DLDVAVLVGSMPr(R)                 |                                                 | 50 | 36.5 | 6.41 |
|    |             |                                                                             | (K)DLDVAVLVGSmPr(R)                 | Oxidation (+16)                                 |    |      |      |
|    |             |                                                                             | (K)VIVVGNPANTNcLTASK(S)             | Carbamidomethyl (+57)                           |    |      |      |
|    |             |                                                                             | (K)LGVTADDVK(N)                     |                                                 |    |      |      |
|    |             |                                                                             | (K)NVIIWGNHSSTQYPDVNHAK(V)          |                                                 |    |      |      |
|    |             |                                                                             | (K)EVGVYEALK(D)                     |                                                 |    |      |      |

|    |             |                                                  |                                              |                                                   |    |      |      |
|----|-------------|--------------------------------------------------|----------------------------------------------|---------------------------------------------------|----|------|------|
|    |             |                                                  | (K)EVGVYEALKDDSWLK(G)                        |                                                   |    |      |      |
|    |             |                                                  | (K)GEFITTQQR(G)                              |                                                   |    |      |      |
|    |             |                                                  | (K)LSSAMSAAK(A)                              |                                                   |    |      |      |
|    |             |                                                  | (R)DIWFGTPEGFEVSmGVISDGNSYGVPPDLLYSFPVVIK(N) | Oxidation (+16)                                   |    |      |      |
| 11 | NP_058933.2 | Ubiquitin carboxyl-terminal hydrolase isozyme L1 | (-)MQLKPmEINPEMLNK(V)                        | Oxidation (+16)                                   | 87 | 24.8 | 5.24 |
|    |             |                                                  | (-)MQLKPmEINPEmLNK(V)                        | Oxidation (+16), Oxidation (+16)                  |    |      |      |
|    |             |                                                  | (-)mQLKPmEINPEmLNK(V)                        | Oxidation (+16), Oxidation (+16), Oxidation (+16) |    |      |      |
|    |             |                                                  | (-)mQLKPmEINPEMLNK(V)                        | Acetyl (+42), Oxidation (+16)                     |    |      |      |
|    |             |                                                  | (R)FADVLGLEEETLGSVPSPAcALLLLFPLTAQHENFR(K)   | Carbamidomethyl (+57)                             |    |      |      |
|    |             |                                                  | (K)QIEELKGQEVSPK(V)                          |                                                   |    |      |      |
|    |             |                                                  | (K)QTIGNScGTIGLIHAVANNQDK(L)                 | Carbamidomethyl (+57)                             |    |      |      |
|    |             |                                                  | (K)QTIGNScGTIGLIHAVANNQDKLEFEDGSVLK(Q)       | Carbamidomethyl (+57)                             |    |      |      |
|    |             |                                                  | (K)LEFEDGSVLK(Q)                             |                                                   |    |      |      |
|    |             |                                                  | (K)LEFEDGSVLKQFLSETEK(L)                     |                                                   |    |      |      |
|    |             |                                                  | (K)NEAIQAAHDSVAQEGQcR(V)                     | Carbamidomethyl (+57)                             |    |      |      |
|    |             |                                                  | (R)VDDKVNHFHILFNNVDGHLIELDGR(M)              |                                                   |    |      |      |
|    |             |                                                  | (K)VNFHILFNNVDGHLIELDGR(M)                   |                                                   |    |      |      |
|    |             |                                                  | (R)mPFPVNHGASEDSLLQDAAK(V)                   | Oxidation (+16)                                   |    |      |      |
|    |             |                                                  | (R)EFTEREQGEVR(F)                            |                                                   |    |      |      |
| 12 | NP_476484.1 | Parkinson disease protein 7 homolog isoform 2    | (K)GAEEMETVIPVDIMR(R)                        |                                                   | 72 | 20   | 6.73 |
|    |             |                                                  | (K)GAEEEmETVIPVDIMR(R)                       | Oxidation (+16)                                   |    |      |      |
|    |             |                                                  | (K)GAEEEmETVIPVDImR(R)                       | Oxidation (+16)                                   |    |      |      |
|    |             |                                                  | (K)VTVAGLAGK(D)                              |                                                   |    |      |      |
|    |             |                                                  | (K)VTVAGLAGKDPVQcSR(D)                       | Carbamidomethyl (+57)                             |    |      |      |
|    |             |                                                  | (R)DVVIcPDTSLEEAK(T)                         | Carbamidomethyl (+57)                             |    |      |      |
|    |             |                                                  | (K)TQGPYDVVVLPGGNLGAQNLSALVK(E)              |                                                   |    |      |      |
|    |             |                                                  | (R)KGLIAAIcAGPTALLAHEVGFGcK(V)               | Carbamidomethyl (+57)                             |    |      |      |
|    |             |                                                  | (R)GPGTSFEFALAIVEALSGK(D)                    | Carbamidomethyl (+57)                             |    |      |      |

<sup>a</sup> the percentage of the sequence covered by identifications from the included searches

<sup>b</sup> the molecular weight of the protein

<sup>c</sup> the observed isoelectric point value
